# Supplementary material
Source: PubMed Central journal article supplement (PMC2867430)
Supplement: 00470.2009_1.pdf [file 00470.2009_1.pdf]

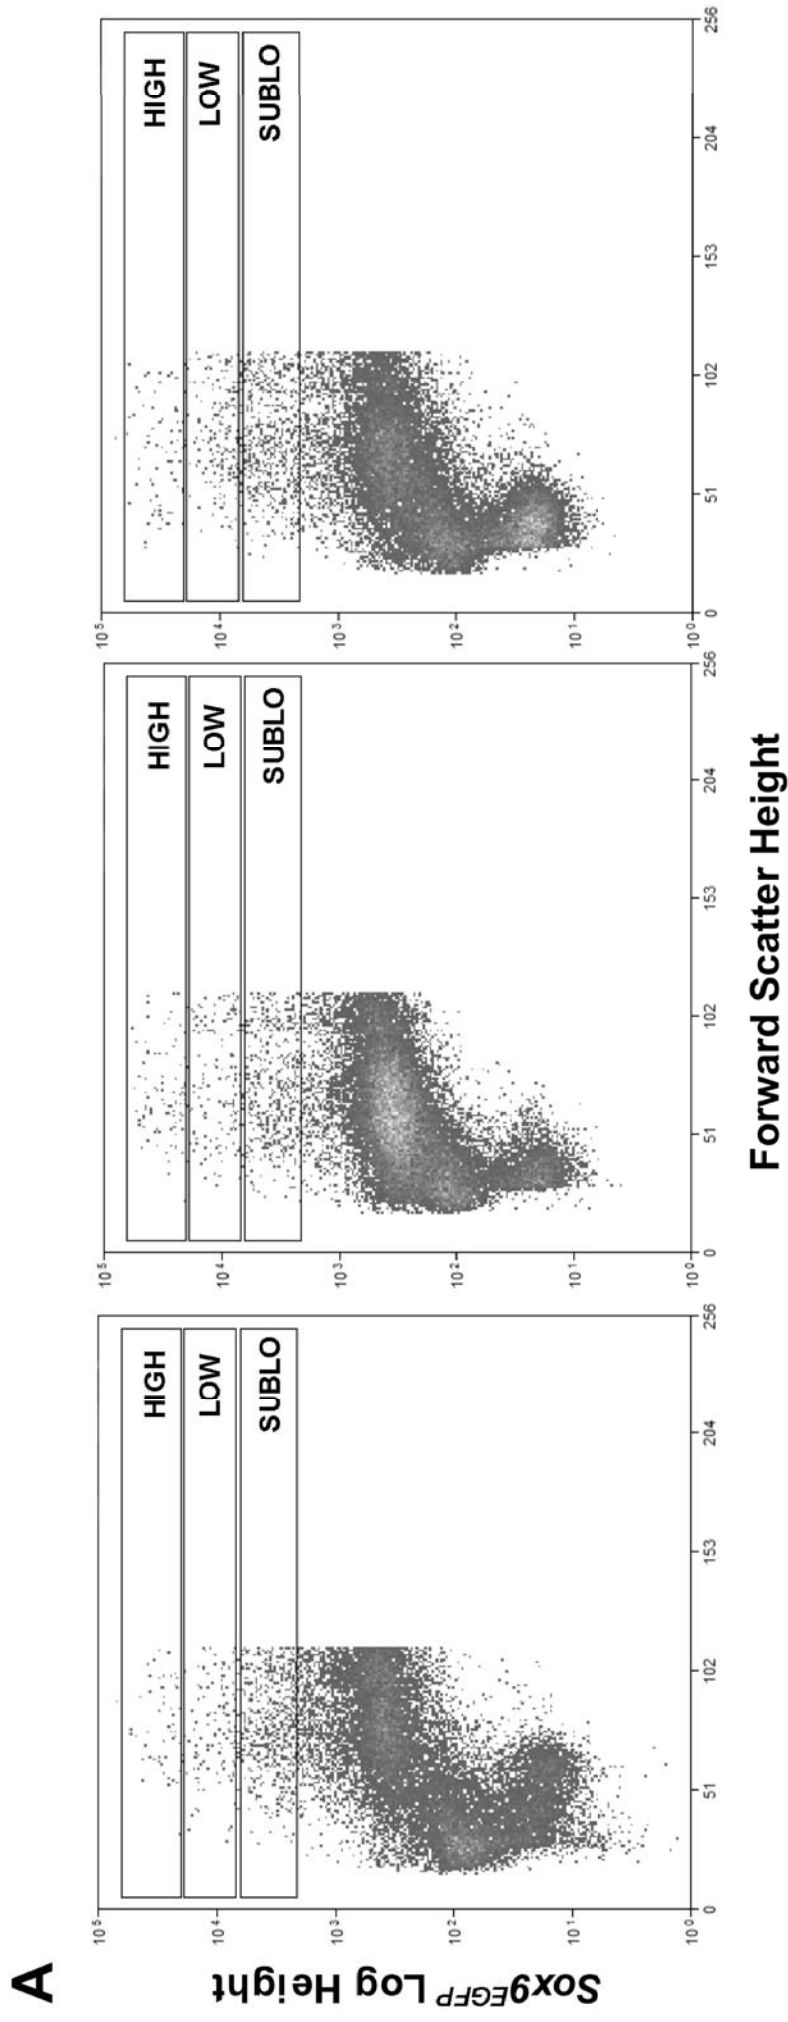

**B**

| Population                 | Experiment 1 | Experiment 2 | Experiment 3 | Average       |
|----------------------------|--------------|--------------|--------------|---------------|
| Sox9 <sup>EGFP</sup> Hi    | 0.25%        | 0.35%        | 0.32%        | 0.31% ± 0.05% |
| Sox9 <sup>EGFP</sup> Lo    | 0.62%        | 0.59%        | 0.85%        | 0.69% ± 0.14% |
| Sox9 <sup>EGFP</sup> subLo | 2.96%        | 1.72%        | 2.58%        | 2.42% ± 0.64% |

\* Percentages represent the numbers of cells within each gate

FIGURE S1

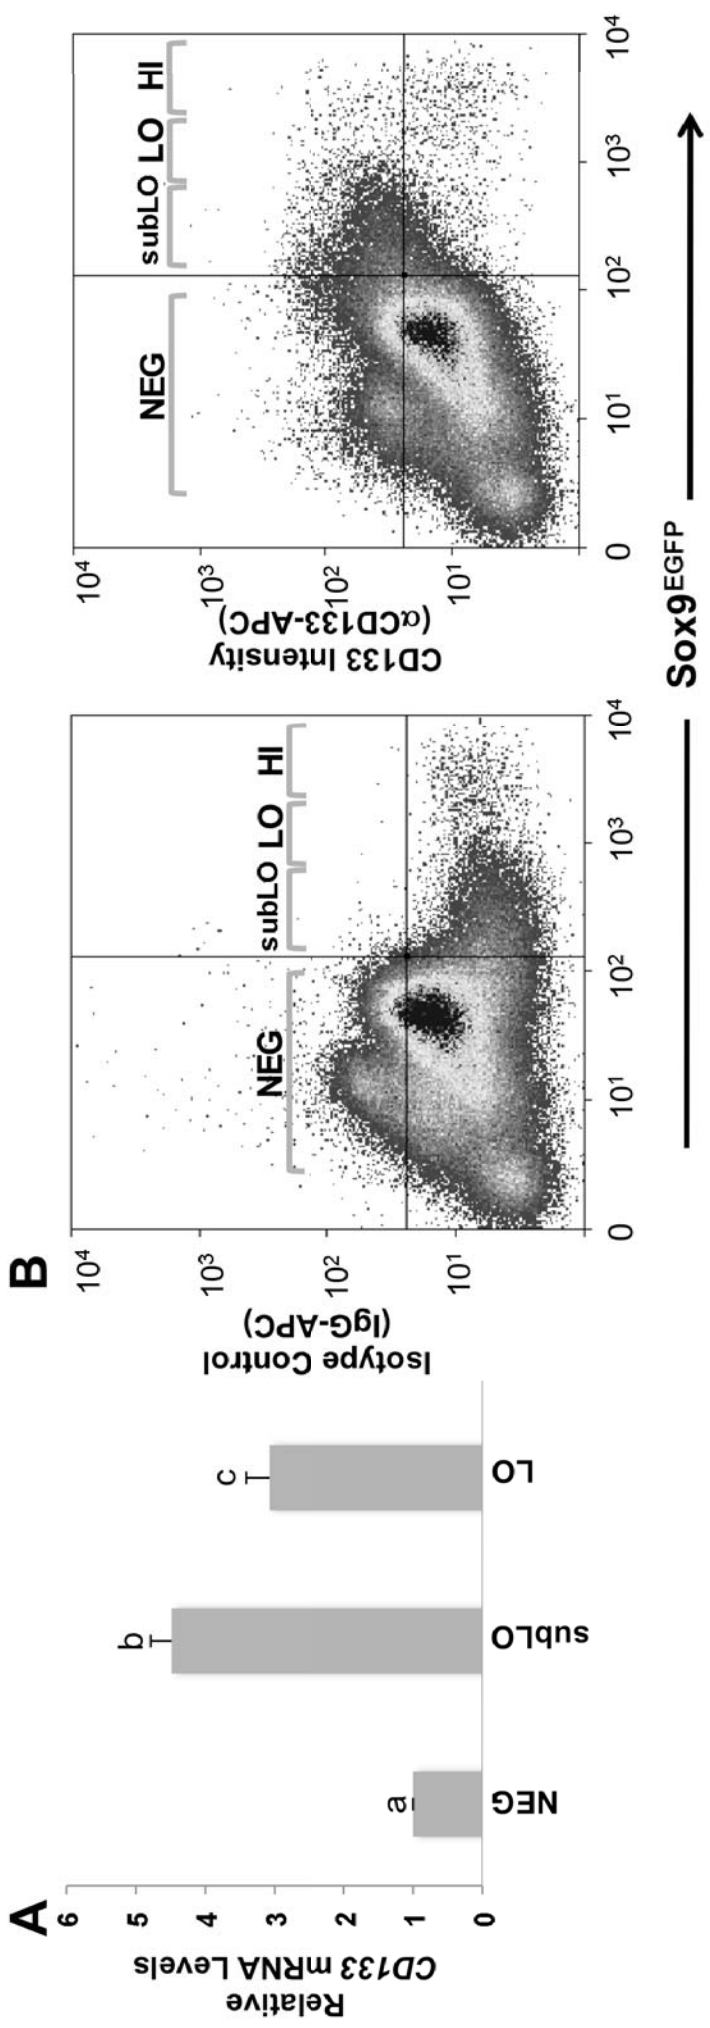

FIGURE S2

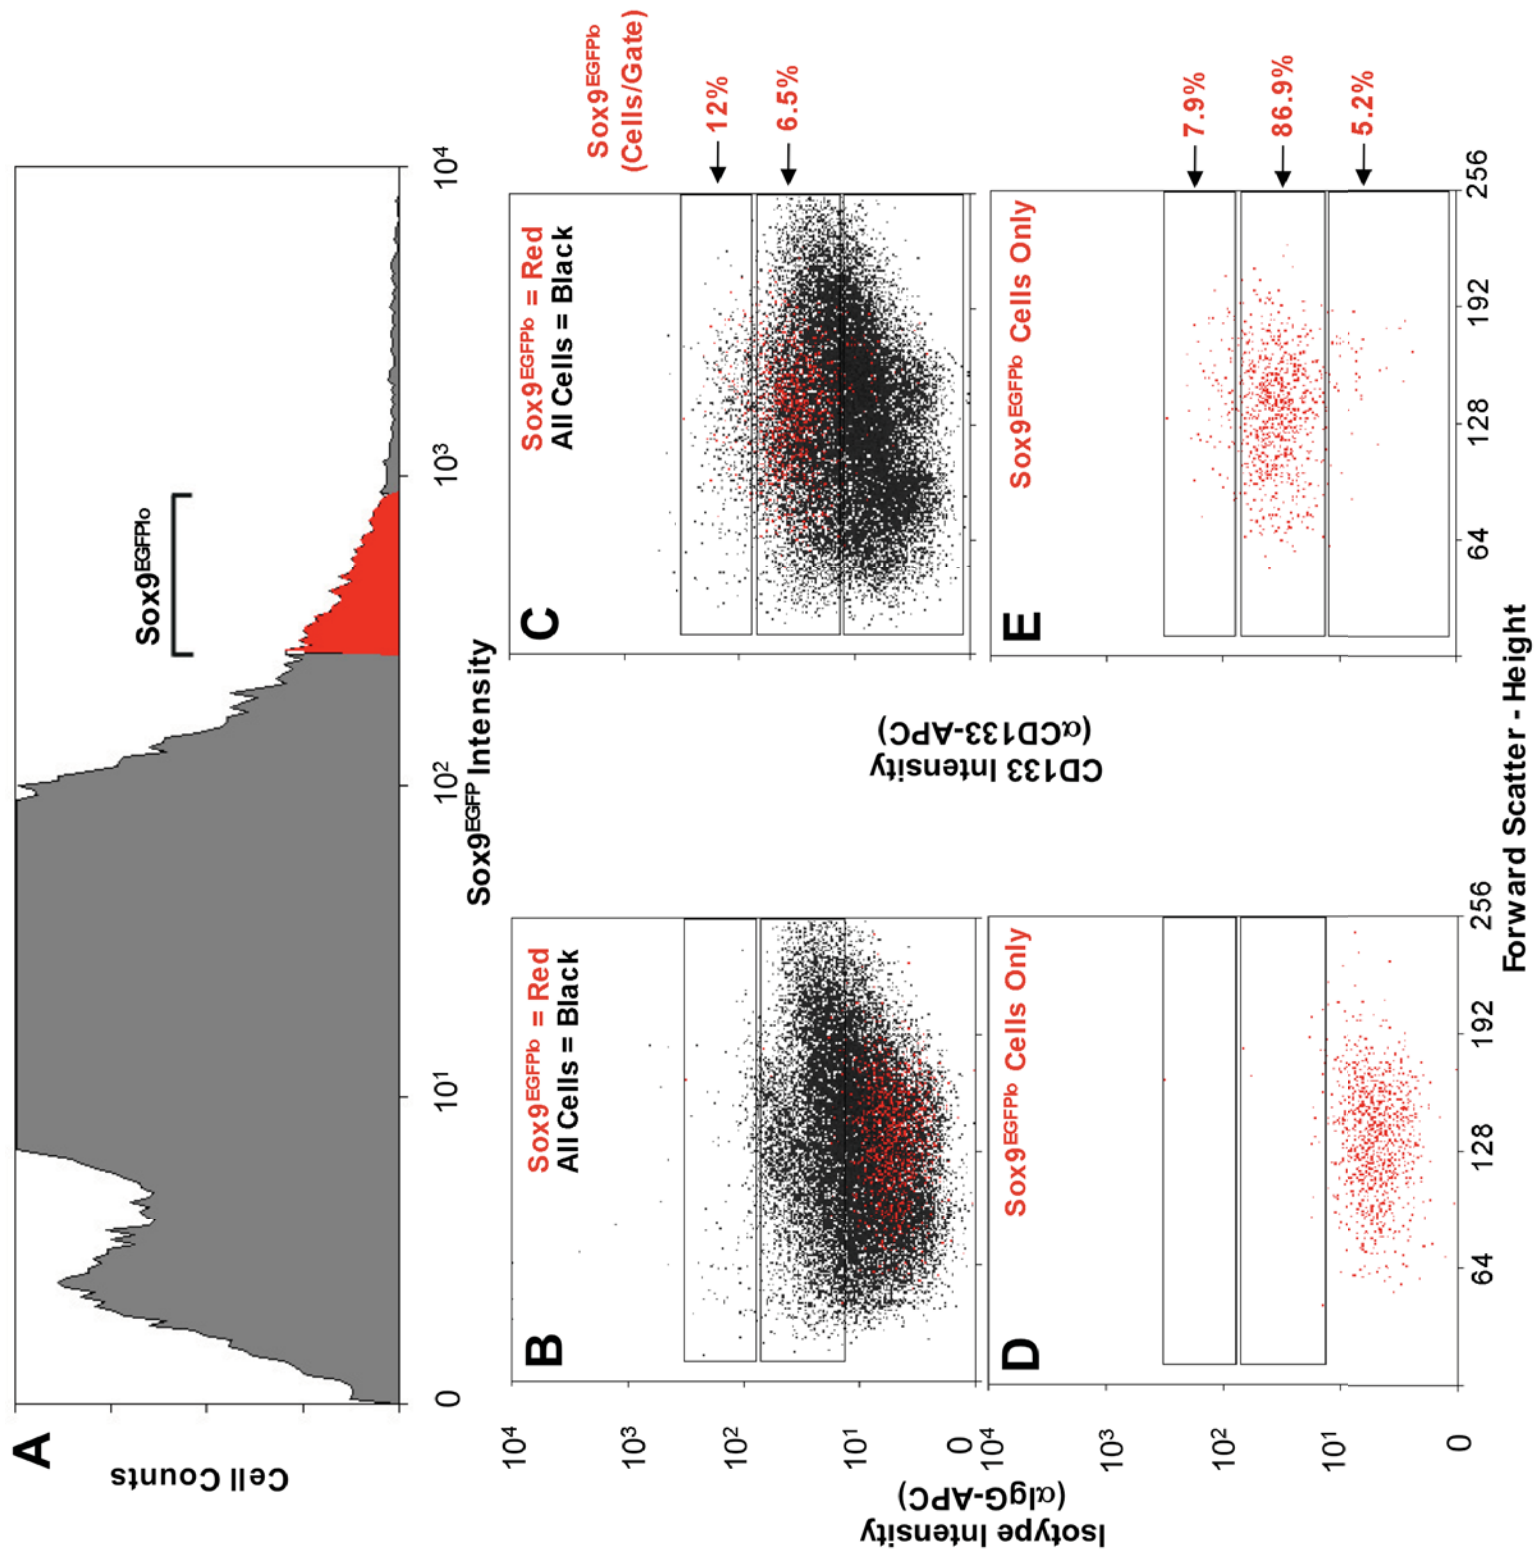

FIGURE S3

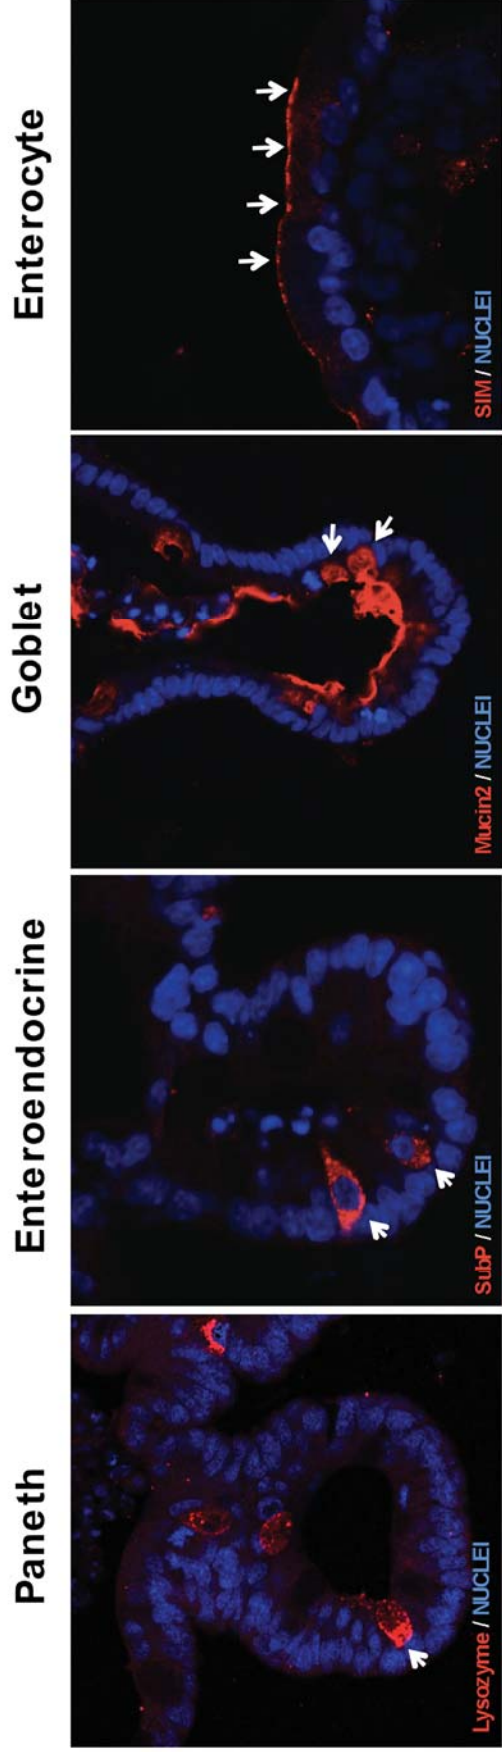

FIGURE S4

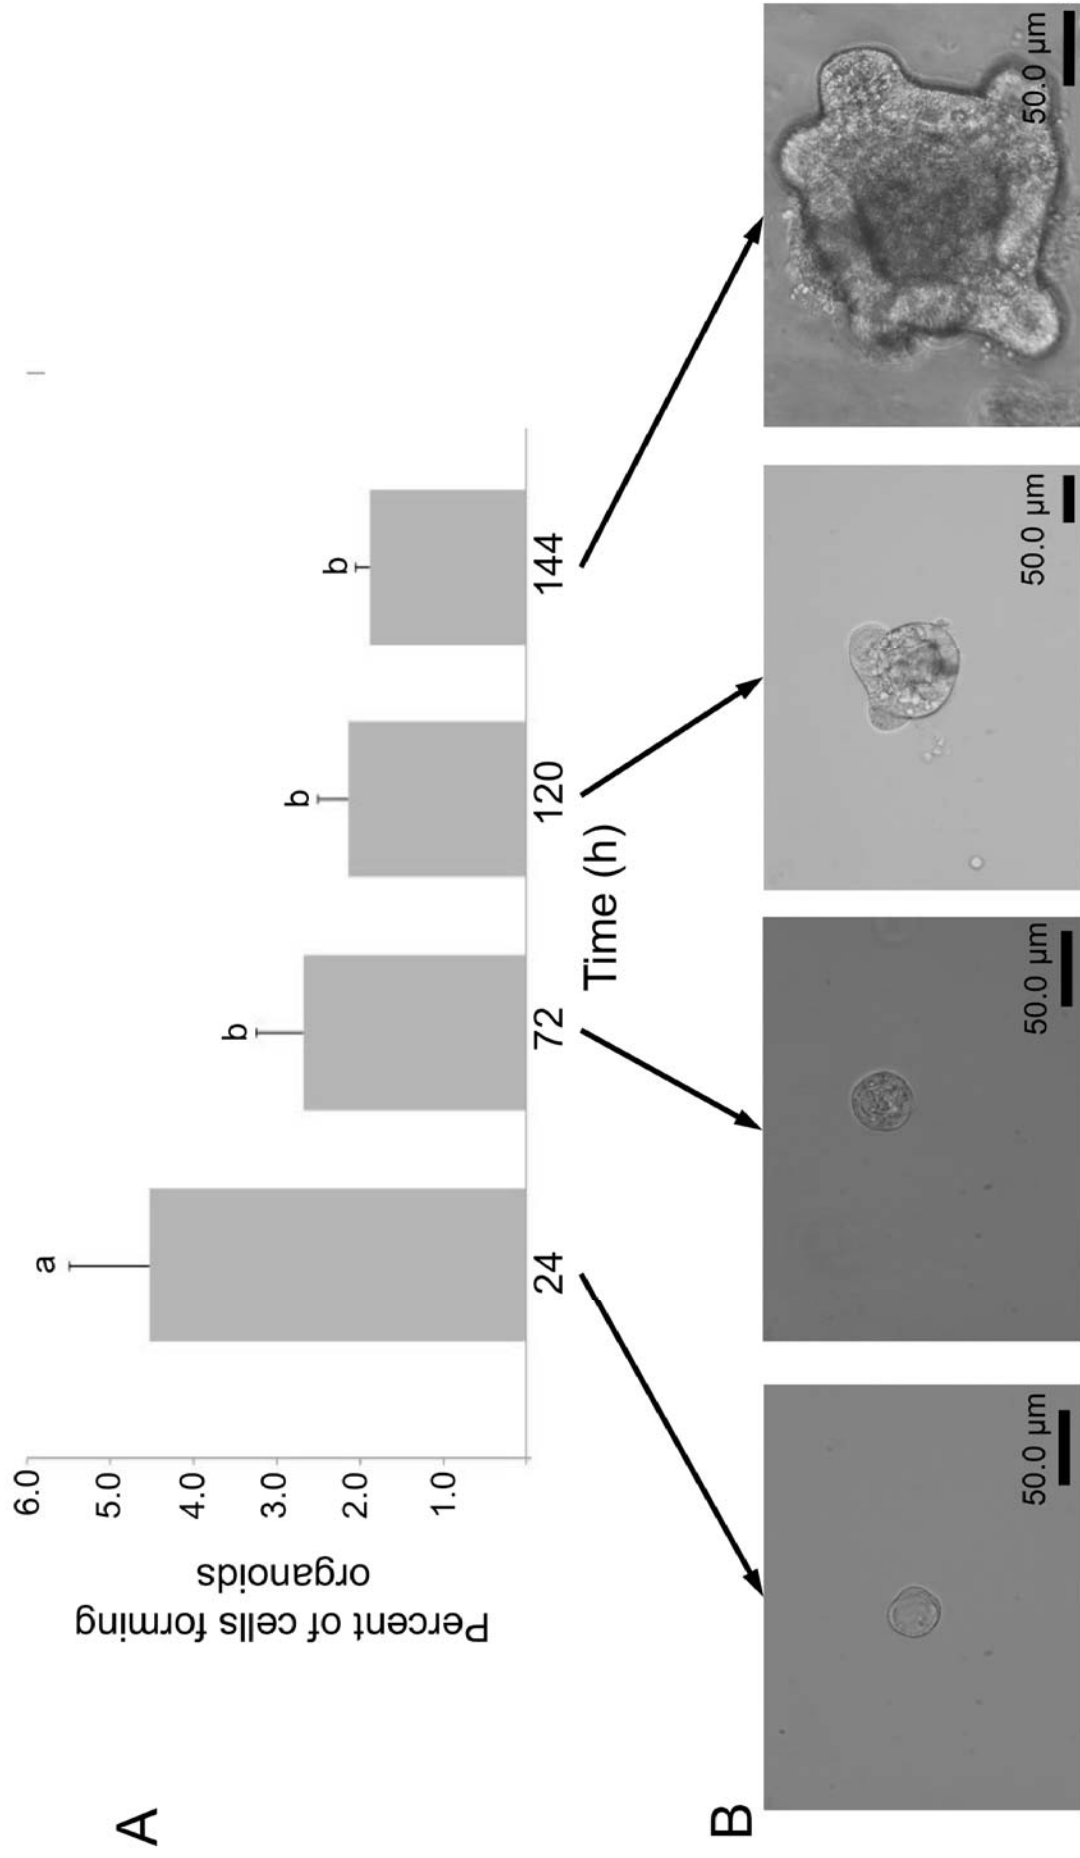

**FIGURE S5**

**Figure S1 – *Sox9*<sup>EGFP</sup> populations are reproducibly separated by FACS** – (A) Three separate FACS experiments performed on three different animals were analyzed to demonstrate that gating protocols for isolating *Sox9*<sup>EGFPsubLo</sup>, *Sox9*<sup>EGFPlo</sup>, and *Sox9*<sup>EGFP<sub>hi</sub></sup> are reproducible based on histograms analyzing EGFP fluorescence. (B) Numerical analysis of these data shows that the percent of sorted cells falling in each gate is consistent between experiments, demonstrating reproducibility in the separation of *Sox9*<sup>EGFP</sup> populations. Cut-off of the events on the right side of the histogram is due to gating parameters to exclude potential doublets.

**Figure S2 – Small intestine epithelial stem/progenitor cells express *CD133* mRNA and protein**

– (A) sqRT-PCR demonstrates *CD133* is expressed 4.4-fold and 3.1-fold higher in the ‘subLO’ and ‘LO’ cells respectively when compared to *Sox9*<sup>EGFP</sup> negative cells. All data points represent means +/- S.E.M. from three independent experiments; statistical analysis was by ANOVA and post-hoc two sample t-tests were then performed. A *p*-value < 0.05 is considered statistically significant. The different letters above each bar represent data points that are statistically different from each other. (B) Flowcytometric analysis indicates that most *Sox9*<sup>EGFP</sup>-positive cells (94.8%) express *CD133* protein. (left panel) APC-conjugated isotype antibody control.  $\alpha$ CD133-APC conjugated antibody. (right panel) Grey brackets in the histograms represent the FACS gating parameters.

**Figure S3 – Using *CD133* as an IESC FACS-enrichment marker is less efficient than *CD24*** –

(A) *Sox9*<sup>EGFP</sup> expression of dissociated small intestine epithelial cells on a univariate EGFP histogram. Black brackets indicate gate parameters. Color gating (red) allows visualization of *Sox9*<sup>EGFPlo</sup> population in histograms A-F. (B) *Sox9*<sup>EGFP</sup>/CD133 bivariate histogram used to define

the CD133 gate parameters. **(C&E)** IgG control antibody indicates there is no significant non-specific staining. **(D&F)**  $\alpha$ CD133-APC antibody labels 94.8%% of  $Sox9^{EGFPlo}$  cells. **(D)** Percentages represent the number of  $Sox9^{EGFPlo}$ -expressing cells in each gate. **(E&F)** Represent just  $Sox9^{EGFPlo}$  cells color back-gated onto the CD133/FSC histogram to highlight their distribution on the histogram. **(F)** Percentages represent the relative number of all  $Sox9^{EGFPlo}$  cells in each gate. **(C&D)** Note that although 94.8% of  $Sox9^{EGFPlo}$  cells express CD133, the shift of the  $Sox9^{EGFPlo}$  population on the CD133 axis is too small to sufficiently separate the  $Sox9^{EGFPlo}$  cells away from non- $Sox9^{EGFPlo}$  cells. The upper-gates in each histogram represent the region of CD133-expressing cells that fall above the isotype control negative population. The lower-gates in each histogram represents the region of CD133-expressing  $Sox9^{EGFPlo}$  cells that fall above the isotype control negative population.

**Figure S4 – CD24-expressing IESCs are multipotent** – 14 day organoids derived from CD24-FACSED IESCs were assessed for the presence of the four differentiated cell lineages of the small intestine epithelium by immunostaining. **(A)** Paneth cells are marked by *Lysozyme* expression (red). **(B)** Enteroendocrine cells are marked by *Substance P* (red). **(C)** Goblet cells are marked by *Mucin2* staining (red). **(D)** Absorptive enterocytes are marked by the brush border enzyme *Sucrase Isomaltase* (SIM – red). All images are 1260 X original magnification.

**Figure S5 – Organoid survival is quantified by identification of unique morphology** - **(A)** Organoids were quantified in culture at 24-hour intervals to determine survival rates. **(A & B)** Following an initial drop, organoid survival at 120-144 hours leveled off at the same time crypt-like budding was observed. **(B)** Organoids were scored as surviving if observed to have a

characteristic morphology, marked by cellular organization in a round structure surrounding an apparently empty (24 hours) or apoptotic (120 hours) pseudo-lumen. All data points represent means  $\pm$  S.E.M. from three independent experiments; statistical analysis was by ANOVA and post-hoc two sample t-tests were then performed. A  $p$ -value  $< 0.05$  is considered statistically significant. The different letters above each bar represent data points that are statistically different from each other.
